# Supplementary material
Source: PubMed Central journal article supplement (PMC10797764)
Supplement: jammi-2023-0007_supplement1.pdf [file jammi-2023-0007_supplement1.pdf]

**Supplemental Table 1.** Clinical Outcomes of Patients with Early and Late Testing

| <b>Variable</b>                                    | <b>Overall<br/>(n= 2452)</b> | <b>Among patients<br/>with early testing<br/>(≤3d)<br/>(n= 2452)</b> | <b>Among patients<br/>with late testing<br/>(&gt;3d)<br/>(n = 2155)</b> | <b>P-<br/>value</b> |
|----------------------------------------------------|------------------------------|----------------------------------------------------------------------|-------------------------------------------------------------------------|---------------------|
| Hospitalization within 30 Days of Diagnosis*       | 232 (9.5%)                   | 113 (4.6%)                                                           | 119 (5.5%)                                                              | 0.16                |
| Days from Diagnosis to Hospital Admission          | 1 (0,5)                      | 3 (1,7)                                                              | 1 (0,2)                                                                 | 0.007               |
| ICU admission within 30 Days of Diagnosis          | 58 (1.3%)                    | 26 (1.1%)                                                            | 32 (1.5%)                                                               | 0.20                |
| Mechanical Ventilation within 30 Days of Diagnosis | 50 (1.1%)                    | 25 (1.0%)                                                            | 25 (1.2%)                                                               | 0.65                |
| Duration of Hospitalization (Days)                 | 7 (3,13)                     | 5 (3,13)                                                             | 8 (4,13)                                                                | 0.63                |
| Duration of Mechanical Ventilation (Days)          | 11 (9, 18)                   | 11(5.8, 20.3)                                                        | 12 (10,14)                                                              | 0.40                |
| Death within 90 Days of Diagnosis                  | 22 (0.5%)                    | 14 (0.6%)                                                            | 8 (0.4%)                                                                | 0.33                |

\*includes COVIDEO patients diagnosed initially as inpatients and subsequently hospitalized, as well as those diagnosed for first time upon or during hospitalization

**Supplemental Table 2.** Multivariable Analysis Examining Predictors of Testing Delays (Incorporating Individual Symptoms rather than Symptom Cluster)

| <b>Patient Characteristic</b> | <b>Adjusted Odds Ratio</b> | <b>95% CI</b>         |
|-------------------------------|----------------------------|-----------------------|
| Age (per year)                | 1.008                      | 1.004-1.012           |
| Female sex                    | 1.054                      | 0.925-1.201           |
| Calendar Month                |                            |                       |
| Jan                           | 0.759                      | 0.582-0.990           |
| Feb                           | 0.701                      | 0.522-0.943           |
| March                         | 0.671                      | 0.506-0.890           |
| April                         | 1.411                      | 1.053-1.889           |
| May                           | 0.313                      | 0.195-0.501           |
| June                          | 0.222                      | 0.092-0.537           |
| July                          | 0.417                      | 0.116-1.499           |
| August                        | 0.226                      | 0.089-0.576           |
| September                     | 0.421                      | 0.289-0.614           |
| October                       | --referent category--      | --referent category-- |
| November                      | 0.771                      | 0.582-1.020           |
| December                      | 1.152                      | 0.893-1.486           |
| Pregnant                      | 1.234                      | 0.733-2.075           |
| Healthcare worker             | 0.478                      | 0.376-0.607           |
| Travel within 14 days         | 1.481                      | 1.047-2.097           |
| Comorbidity                   | 0.871                      | 0.751-1.009           |
| Known exposure to COVID-19    | 0.993                      | 0.874-1.128           |
| Individual Symptoms           |                            |                       |
| Fever                         | 0.937                      | 0.812-1.081           |
| Pharyngitis                   | 0.779                      | 0.675-0.899           |
| Rhinorrhea                    | 1.121                      | 0.976-1.287           |
| Cough                         | 1.055                      | 0.923-1.205           |
| Sputum Production             | 1.441                      | 1.011-2.054           |
| Hemoptysis                    | 0.942                      | 0.268-3.311           |
| Dyspnea                       | 2.256                      | 1.725-2.950           |
| Chills                        | 0.957                      | 0.806-1.136           |
| Chest Pain                    | 0.911                      | 0.701-1.185           |
| Otagia                        | 1.114                      | 0.746-1.662           |
| Conjunctivitis                | 0.802                      | 0.551-1.167           |
| Anosmia                       | 1.742                      | 1.404-2.161           |
| Dysgeusia                     | 1.348                      | 1.085-1.677           |
| Myalgia                       | 0.847                      | 0.728-0.984           |
| Arthralgia                    | 1.145                      | 0.907-1.447           |
| Abdominal Pain                | 1.056                      | 0.785-1.419           |
| Nausea/Vomiting               | 1.148                      | 0.912-1.445           |
| Diarrhea                      | 1.140                      | 0.925-1.404           |
| Lymphadenopathy               | 0.635                      | 0.201-2.006           |
| Rash                          | 1.047                      | 0.611-1.795           |

|                    |       |             |
|--------------------|-------|-------------|
| Fatigue            | 1.042 | 0.905-1.201 |
| Headache           | 0.819 | 0.712-0.941 |
| Confusion          | 0.907 | 0.544-1.514 |
| Depression/Anxiety | 1.042 | 0.758-1.433 |
| Insomnia           | 0.837 | 0.637-1.101 |
| Anorexia           | 1.345 | 1.106-1.637 |
